# Supplementary material for: Clustering of Aromatic Amino Acid Residues around Methionine in Proteins
Source: MDPI journal article supplement (doi:10.3390/biom12010006), 2021-12-21
Supplement: s1 [file s1]

*Supporting Information for:*

## Clustering of aromatic amino acid residues around methionine in proteins

Curtis A. Gibbs,<sup>†</sup> David S. Weber,<sup>†</sup> and Jeffrey J. Warren\*

Simon Fraser University  
Department of Chemistry  
8888 University Drive  
Burnaby BC V5A 1S6  
Canada

\*jjwarren@sfu.ca

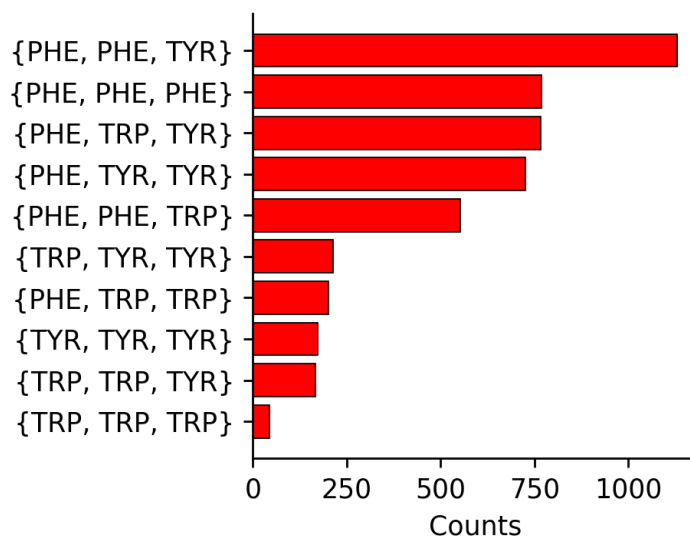

**Figure S1.** Summary of the identities of 3-bridges. The counts correlate with the number of points shown in Figures S2 to S11, below.

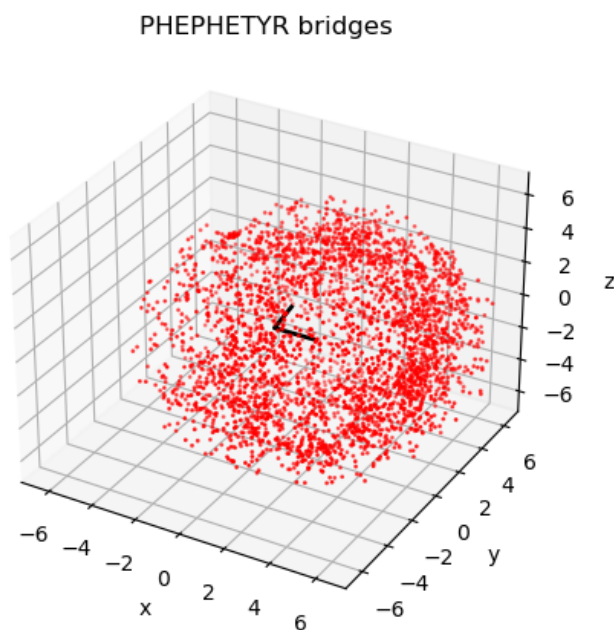

**Figure S2.** Plots of clustering of Phe and Tyr around Met in {Phe, Phe, Tyr} bridges. The x, y, and z axes are in Ångstroms. The black V-shape at the origin depicts the CH<sub>3</sub>-S-CH<sub>2</sub> thioether of Met. The arm pointing away from the reader (along +y) is the CH<sub>2</sub> group. Each point corresponds to an aromatic centroid for each respective amino acid residue.

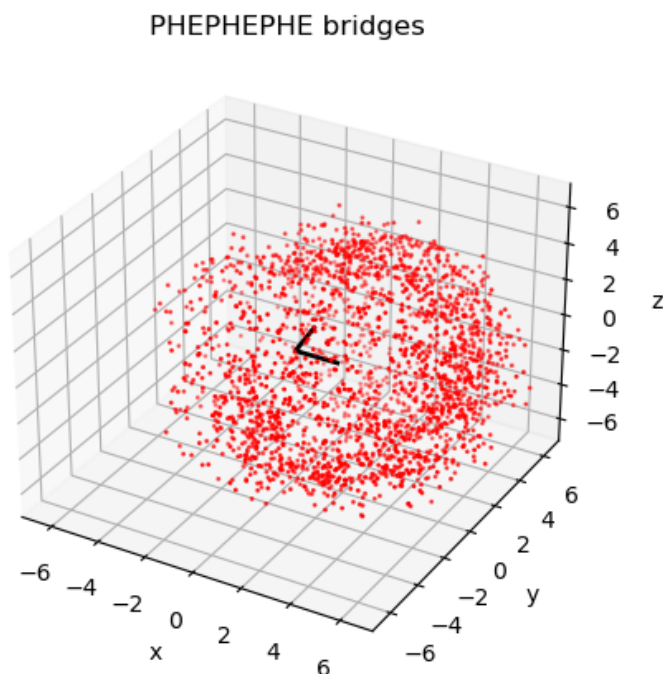

**Figure S3.** Plots of clustering of Phe around Met in {Phe, Phe, Phe} bridges. The x, y, and z axes are in Ångstroms. The black V-shape at the origin depicts the CH<sub>3</sub>-S-CH<sub>2</sub> thioether of Met. The arm pointing away from the reader (along +y) is the CH<sub>2</sub> group. Each point corresponds to an aromatic centroid for each respective amino acid residue.

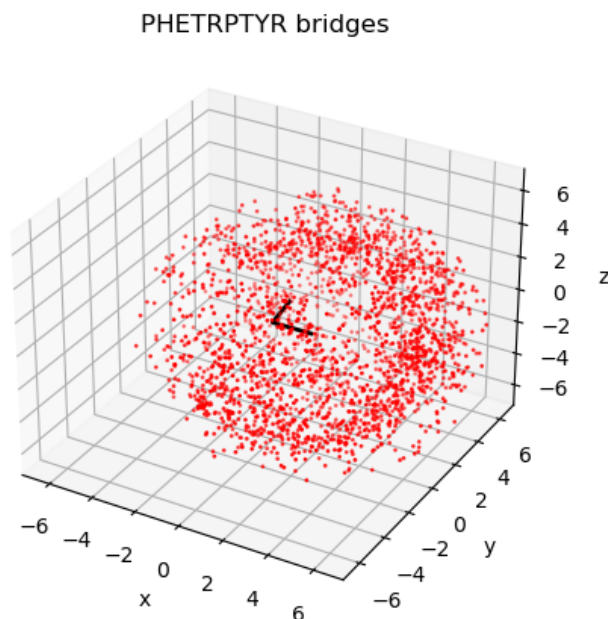

**Figure S4.** Plots of clustering of Phe, Trp, and Tyr around Met in {Phe, Trp, Tyr} bridges. The x, y, and z axes are in Ångstroms. The black V-shape at the origin depicts the CH<sub>3</sub>-S-CH<sub>2</sub> thioether of Met. The arm pointing away from the reader (along +y) is the CH<sub>2</sub> group. Each point corresponds to an aromatic centroid for each respective amino acid residue.

PHETYRTYR bridges

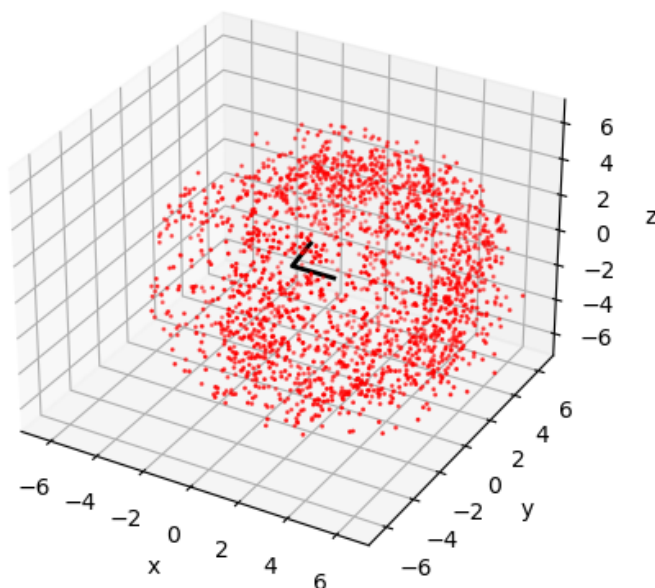

**Figure S5.** Plots of clustering of Phe, Tyr, and Tyr around Met in {Phe, Tyr, Tyr} bridges. The x, y, and z axes are in Ångströms. The black V-shape at the origin depicts the CH<sub>3</sub>-S-CH<sub>2</sub> thioether of Met. The arm pointing away from the reader (along +y) is the CH<sub>2</sub> group. Each point corresponds to an aromatic centroid for each respective amino acid residue.

PHEPHETRP bridges

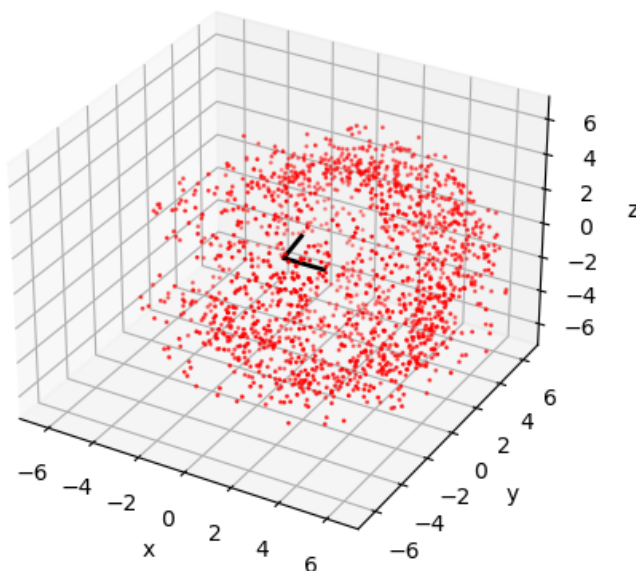

**Figure S6.** Plots of clustering of Phe, Phe, and Trp around Met in {Phe, Phe, Trp} bridges. The x, y, and z axes are in Ångströms. The black V-shape at the origin depicts the CH<sub>3</sub>-S-CH<sub>2</sub> thioether of Met. The arm pointing away from the reader (along +y) is the CH<sub>2</sub> group. Each point corresponds to an aromatic centroid for each respective amino acid residue.

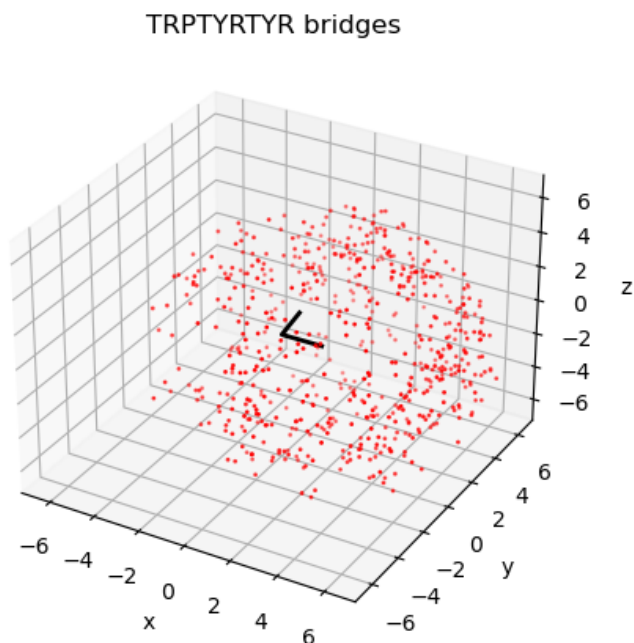

**Figure S7.** Plots of clustering of Trp, Tyr, and Tyr around Met in {Trp, Tyr, Tyr} bridges. The x, y, and z axes are in Ångströms. The black V-shape at the origin depicts the CH<sub>3</sub>-S-CH<sub>2</sub> thioether of Met. The arm pointing away from the reader (along +y) is the CH<sub>2</sub> group. Each point corresponds to an aromatic centroid for each respective amino acid residue.

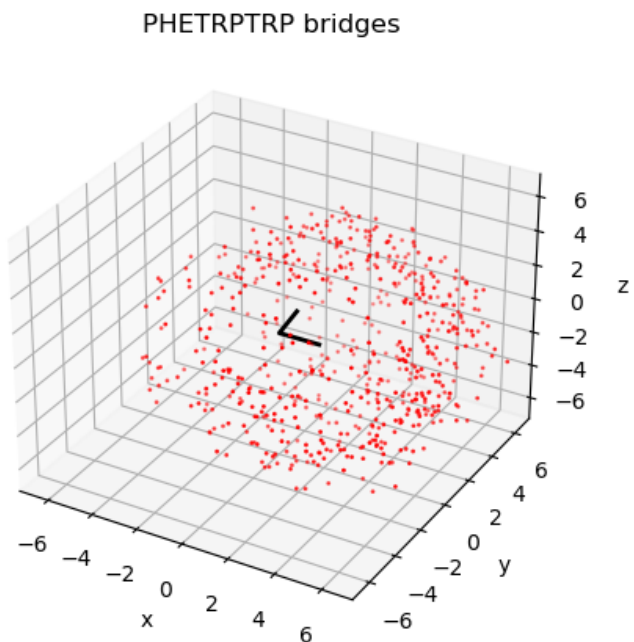

**Figure S8.** Plots of clustering of Phe, Trp, and Trp around Met in {Phe, Trp, Trp} bridges. The x, y, and z axes are in Ångströms. The black V-shape at the origin depicts the CH<sub>3</sub>-S-CH<sub>2</sub> thioether of Met. The arm pointing away from the reader (along +y) is the CH<sub>2</sub> group. Each point corresponds to an aromatic centroid for each respective amino acid residue.

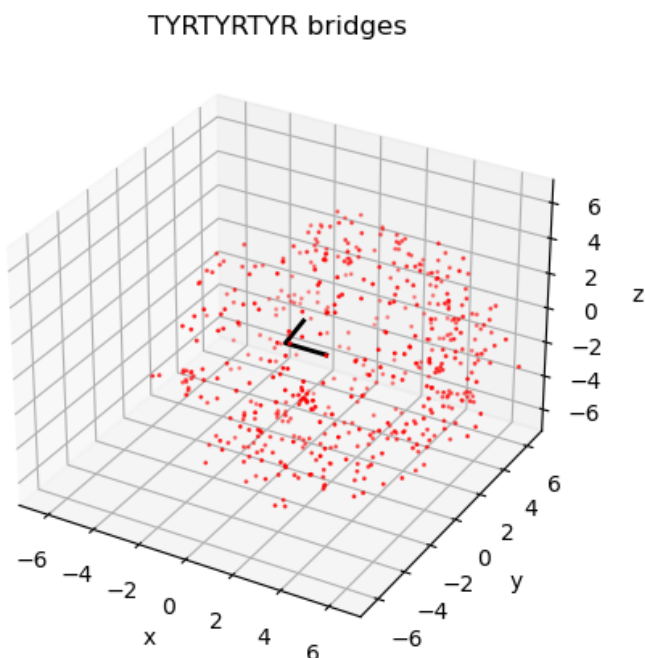

**Figure S9.** Plots of clustering of Tyr, Tyr, and Tyr around Met in {Tyr, Tyr, Tyr} bridges. The x, y, and z axes are in Ångströms. The black V-shape at the origin depicts the  $\text{CH}_3\text{-S-CH}_2$  thioether of Met. The arm pointing away from the reader (along +y) is the  $\text{CH}_2$  group. Each point corresponds to an aromatic centroid for each respective amino acid residue.

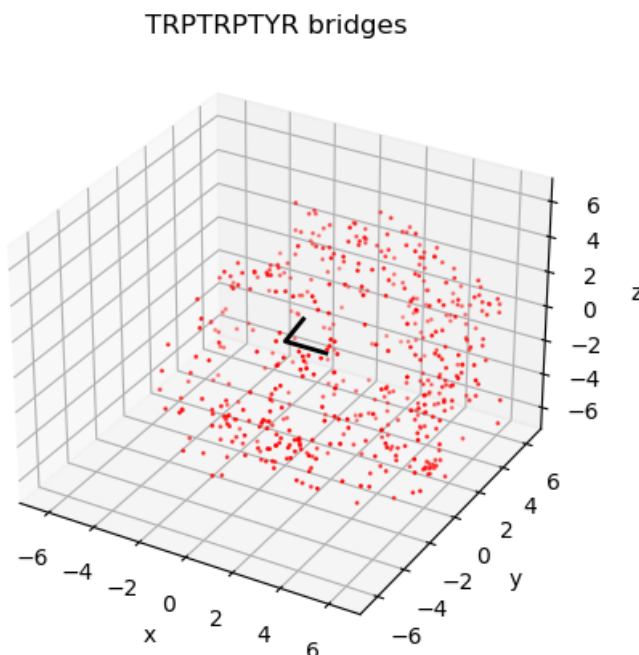

**Figure S10.** Plots of clustering of Trp, Trp, and Tyr around Met in {Trp, Trp, Tyr} bridges. The x, y, and z axes are in Ångströms. The black V-shape at the origin depicts the  $\text{CH}_3\text{-S-CH}_2$  thioether of Met. The arm pointing away from the reader (along +y) is the  $\text{CH}_2$  group. Each point corresponds to an aromatic centroid for each respective amino acid residue.

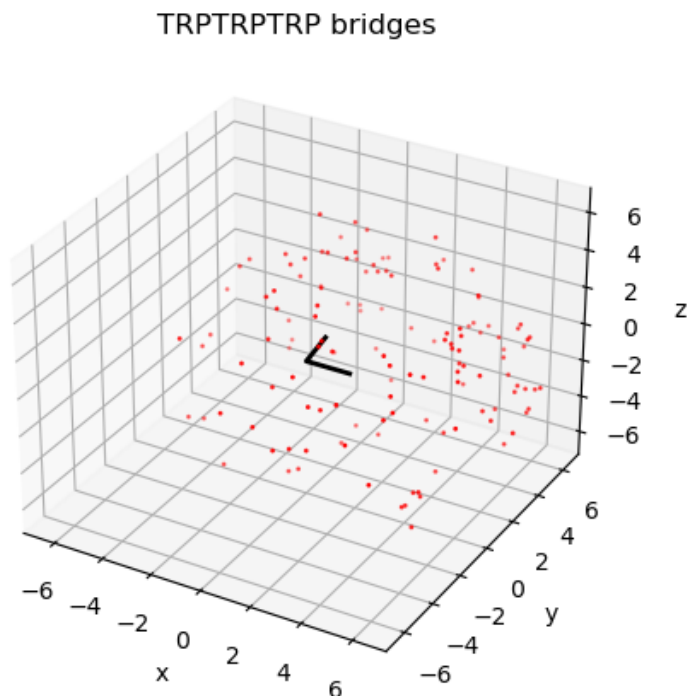

**Figure S11.** Plots of clustering of Trp, Trp, and Trp around Met in {Trp, Trp, Trp} bridges. The x, y, and z axes are in Ångströms. The black V-shape at the origin depicts the CH<sub>3</sub>-S-CH<sub>2</sub> thioether of Met. The arm pointing away from the reader (along +y) is the CH<sub>2</sub> group. Each point corresponds to an aromatic centroid for each respective amino acid residue.

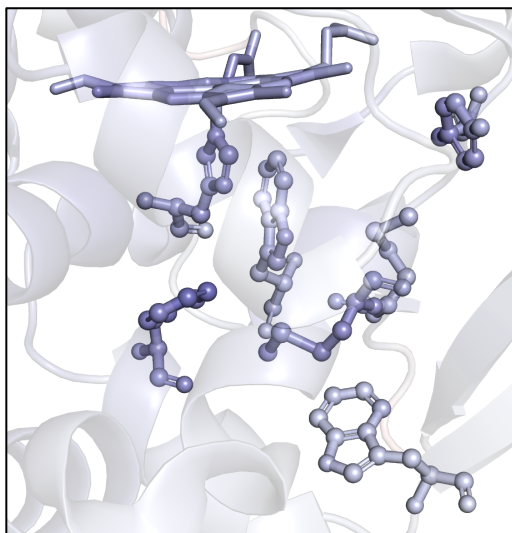

**Figure S12.** Flexibility color spectrum for yeast cytochrome *c* peroxidase (PDB ID 2CYP) using residue B-factors from the PDB. The spectrum from dark purple through white to dark red represents lower to higher areas of flexibility, respectively.



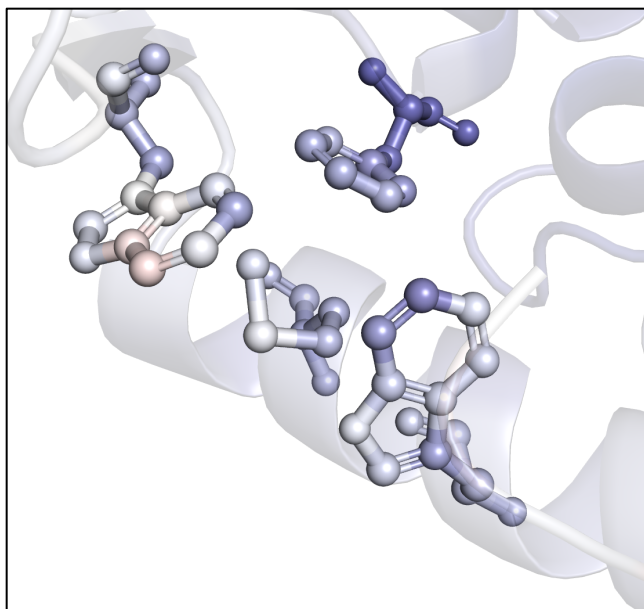

**Figure S13.** Flexibility color spectrum for cytochrome P450 from *T. bispora* (PDB ID 5VWS) using residue B-factors from the PDB. The spectrum from dark purple through white to dark red represents lower to higher areas of flexibility, respectively.

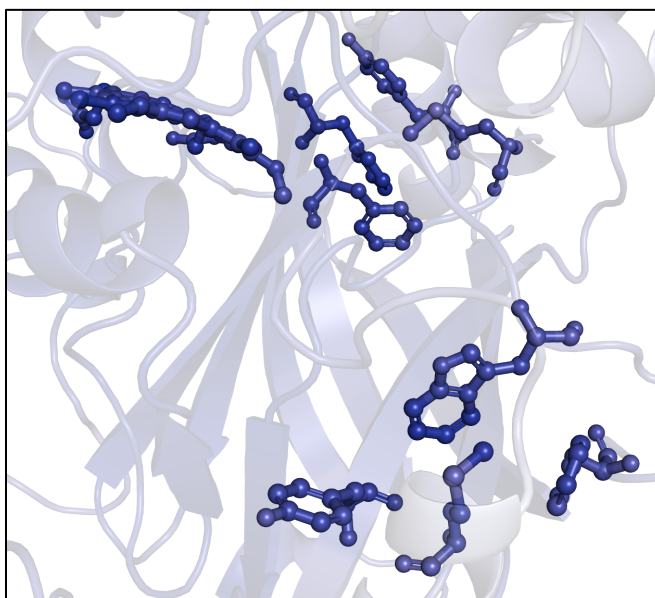

**Figure S14.** Flexibility color spectrum for yeast catalase (PDB ID 1A4E) using residue B-factors from the PDB. The spectrum from dark purple through white to dark red represents lower to higher areas of flexibility, respectively.



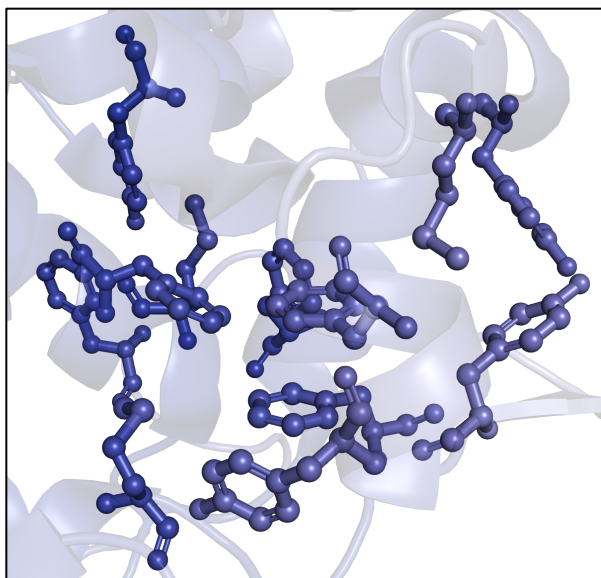

**Figure S15.** Flexibility color spectrum for prostaglandin H2 synthase 1 (PDB ID 1Q4G) using residue B-factors from the PDB. The spectrum from dark purple through white to dark red represents lower to higher areas of flexibility, respectively.

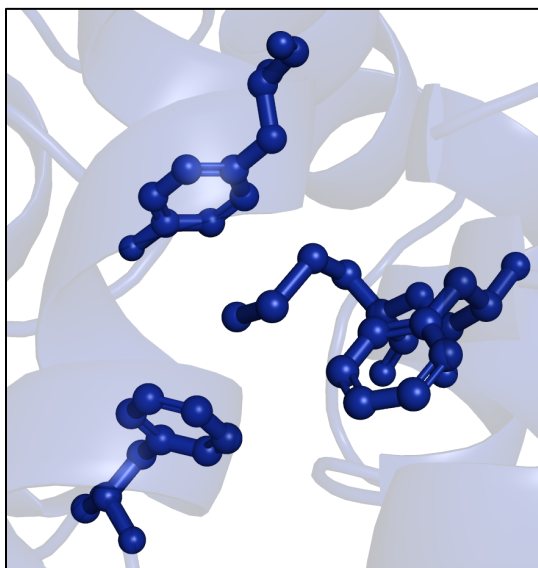

**Figure S16.** Flexibility color spectrum for haloalkane dehalogenase from *X. autotrophicus* (PDB ID 1B6G) using residue B-factors from the PDB. The spectrum from dark purple through white to dark red represents lower to higher areas of flexibility, respectively.

**Table S1.** Calculated interaction energies in the 3-bridge cluster in biphenyl dioxygenase from *C. testosterone* (PDB ID 3GZY)<sup>a</sup>

|                               | Met439 <sup>b</sup> | Trp220 <sup>c</sup> | Phe325 <sup>c</sup> | Tyr440 <sup>c</sup> |
|-------------------------------|---------------------|---------------------|---------------------|---------------------|
| Wild type                     | -8.71               | -0.60               | -0.93               | -2.29               |
| Trp220Ala                     | -8.16               | -0.01               | -0.93               | -2.28               |
| Phe325Ala                     | -7.71               | -0.58               | -0.12               | -2.28               |
| Tyr440Ala                     | -6.55               | -0.55               | -0.92               | -0.20               |
| Trp220Ala/Phe325Ala           | -7.18               | -0.01               | -0.12               | -2.27               |
| Trp220Ala/Tyr440Ala           | -6.07               | -0.01               | -0.87               | -0.20               |
| Phe325Ala/Tyr440Ala           | -5.58               | -0.52               | -0.12               | -0.20               |
| Trp220Ala/Phe325Ala/Tyr440Ala | -5.13               | -0.01               | -0.12               | -0.20               |
| Met439Ala                     | -1.52               | -0.01               | -0.20               | -0.37               |

<sup>a</sup> Energies in kcal mol<sup>-1</sup>. <sup>b</sup> Net interaction energy (side chain versus side chain). <sup>c</sup> Pairwise sidechain to sidechain interaction energy with the residue at position 439.

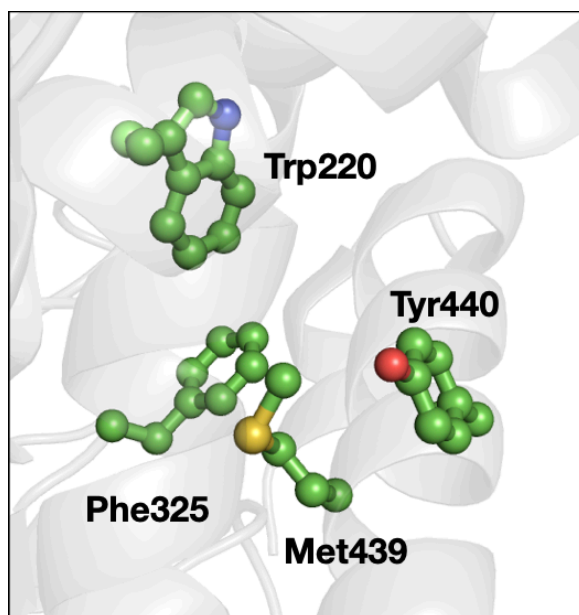

**Figure S17.** Structure of the 3-bridge cluster in biphenyl dioxygenase from *C. testosterone* (PDB ID 3GZY). The structure corresponds to Table S1.
